# Supplementary material
Source: Springer Nature journal article supplement (https://www.springermedizin.de/resource/supplementary/13013_2012_549_MOESM6_ESM.pdf/9631886)

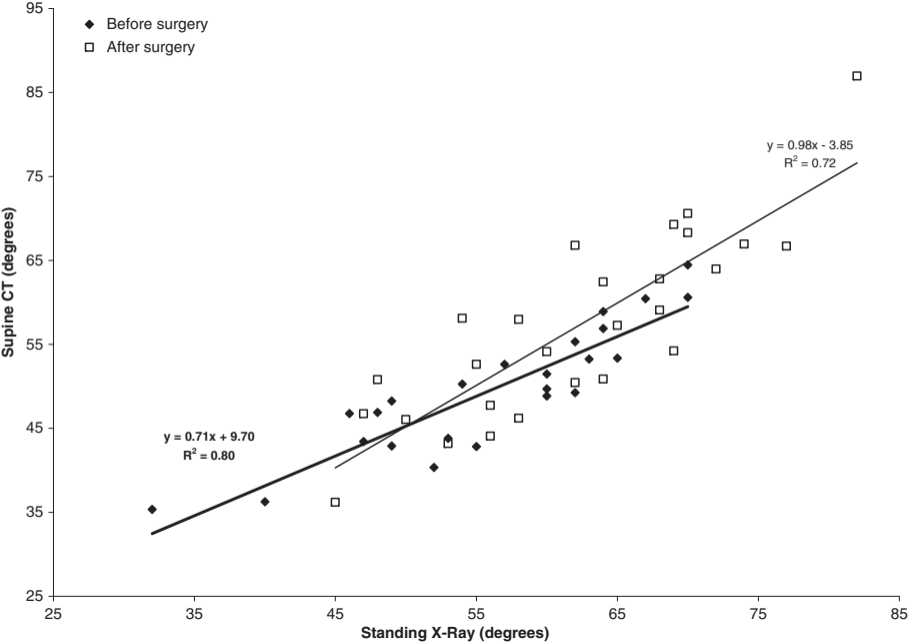

Supplement: MOESM6 [file 9631886]
